# Supplementary material
Source: publisher figshare collection journal article supplement (https://acs.figshare.com/ndownloader/files/4149676)
Supplement: Supplementary file 1 [file 4149676]

## Supporting Information

# Rare-Earth-Metal Complexes Supported by New Chiral Tetra-Azane Chelating Ligands: Synthesis, Characterization, and Catalytic Properties for Intramolecular Asymmetric Hydroamination

Yanyu Zhang, Wei Yao, He Li and Ying Mu\*

State Key Laboratory for Supramolecular Structure and Materials, School of Chemistry, Jilin University,  
2699 Qianjin Street, Changchun 130012, People's Republic of China

## Contents

**Figure S1.**  $^1\text{H}$  and  $^{13}\text{C}$  NMR spectra of **S1** in  $\text{CDCl}_3$ .

**Figure S2.**  $^1\text{H}$  and  $^{13}\text{C}$  NMR spectra of **S2** in  $\text{CDCl}_3$ .

**Figure S3.**  $^1\text{H}$  and  $^{13}\text{C}$  NMR spectra of **S3** in  $\text{CDCl}_3$ .

**Figure S4.**  $^1\text{H}$  NMR spectra of **S4** in  $\text{CDCl}_3$ .

**Figure S5.**  $^1\text{H}$  and  $^{13}\text{C}$  NMR spectra of **S5** in  $\text{CDCl}_3$ .

**Figure S6.**  $^1\text{H}$  and  $^{13}\text{C}$  NMR spectra of **S6** in  $\text{CDCl}_3$ .

**Figure S7.**  $^1\text{H}$  and  $^{13}\text{C}$  NMR spectra of **P1** in  $\text{C}_6\text{D}_6$ .

**Figure S8.**  $^1\text{H}$  and  $^{13}\text{C}$  NMR spectra of **P2** in  $\text{CDCl}_3$ .

**Figure S9.**  $^1\text{H}$  and  $^{13}\text{C}$  NMR spectra of **P3** in  $\text{CDCl}_3$ .

**Figure S10.**  $^1\text{H}$  and  $^{13}\text{C}$  NMR spectra of **P4** in  $\text{C}_6\text{D}_6$ .

**Figure S11.**  $^1\text{H}$  NMR spectrum of the mixture of **P1** and (R)-(-)-O-acetylmandelic acid in  $\text{CDCl}_3$ .

**Figure S12.**  $^1\text{H}$  NMR spectrum of the mixture of **P2** and (R)-(-)-O-acetylmandelic acid in  $\text{CDCl}_3$ .

**Figure S13.**  $^1\text{H}$  NMR spectrum of the mixture of **P3** and (R)-(-)-O-acetylmandelic acid in  $\text{CDCl}_3$ .

**Figure S14.**  $^1\text{H}$  NMR spectrum of the mixture of **P4** and (R)-(-)-O-acetylmandelic acid in  $\text{CDCl}_3$ .

**Figure S15.** HPLC trace and integration data from the naphthoylamide of **P6**.

**Figure S16-20.** Time dependence of substrate concentration in the hydroamination/ cyclization.

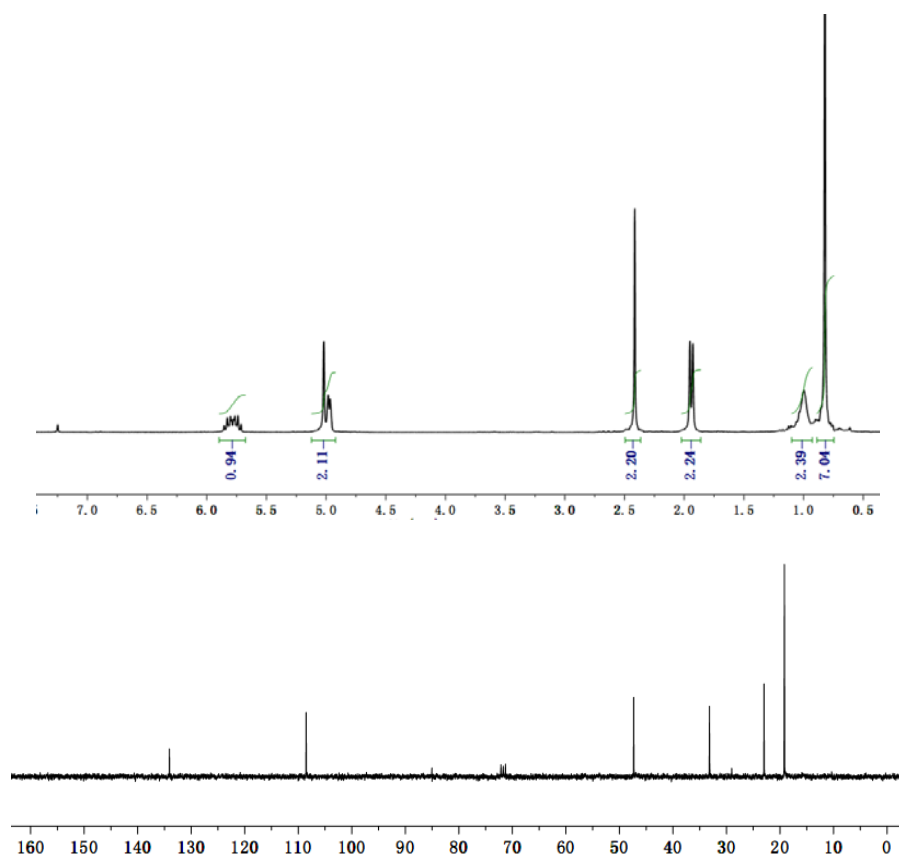

**Figure S1.**  $^1\text{H}$  and  $^{13}\text{C}$  NMR spectra of the substrate **S1** in  $\text{CDCl}_3$

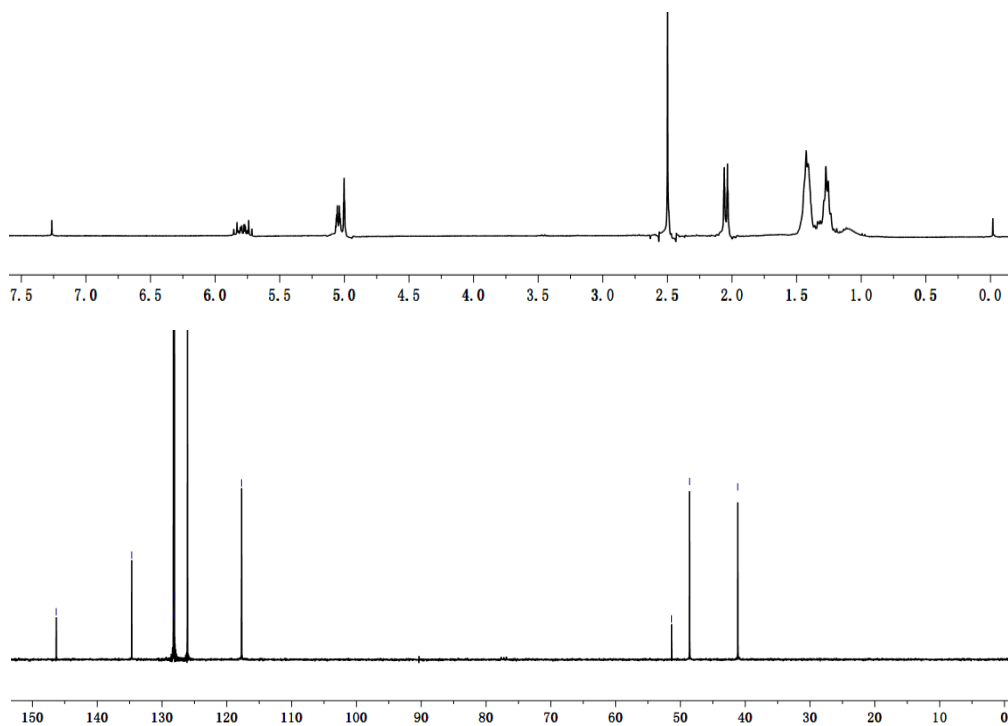

**Figure S2.**  $^1\text{H}$  and  $^{13}\text{C}$  NMR spectra of the substrate **S2** in  $\text{CDCl}_3$ .

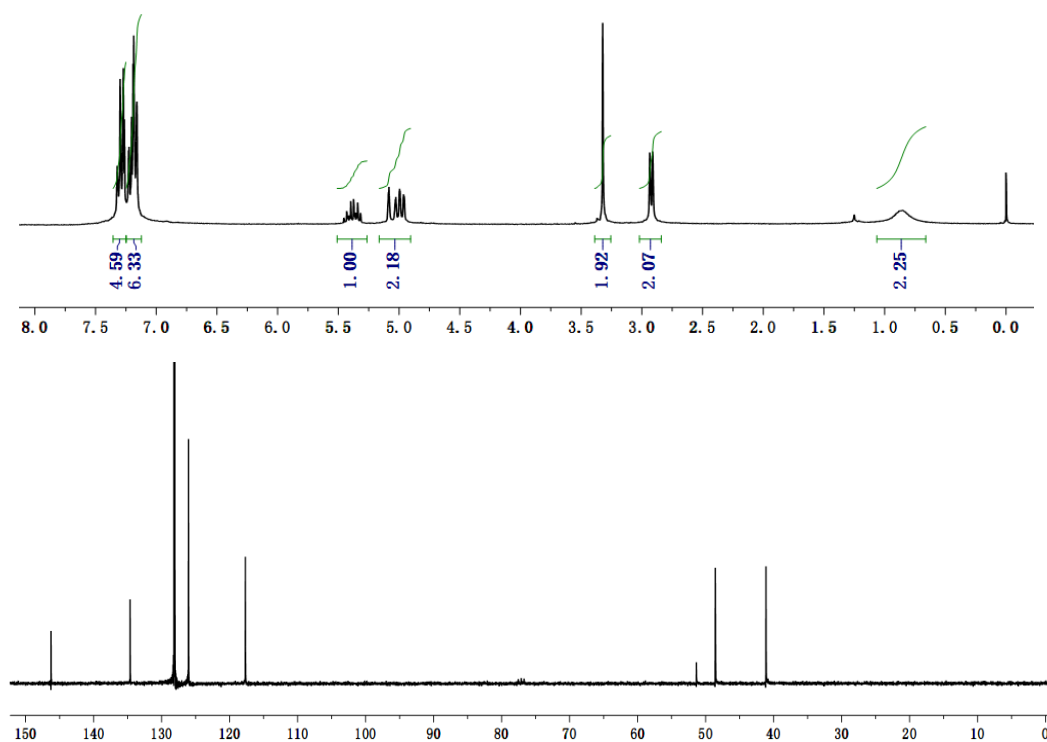

**Figure S3.**  $^1\text{H}$  and  $^{13}\text{C}$  NMR spectra of the substrate **S3** in  $\text{CDCl}_3$ .

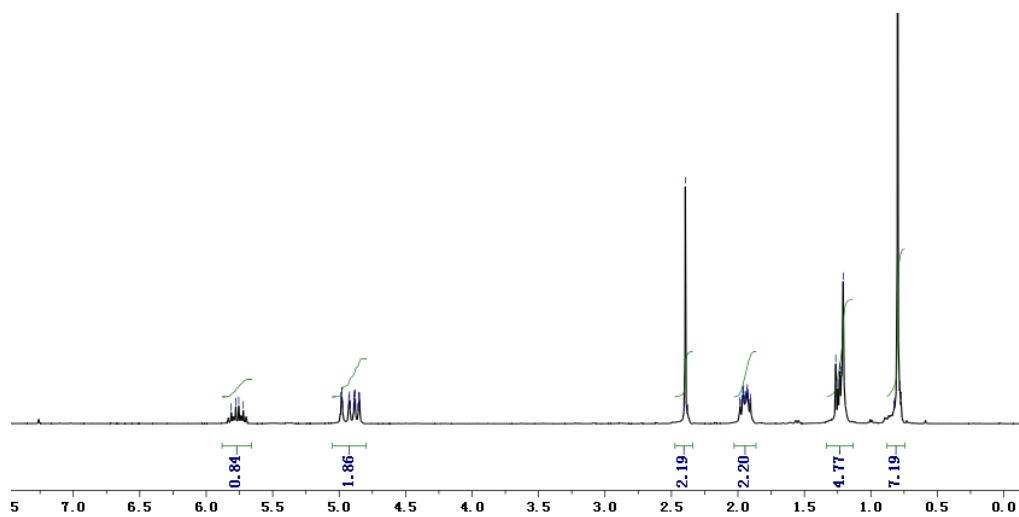

**Figure S4.**  $^1\text{H}$  NMR spectra of the substrate **S4** in  $\text{CDCl}_3$ .

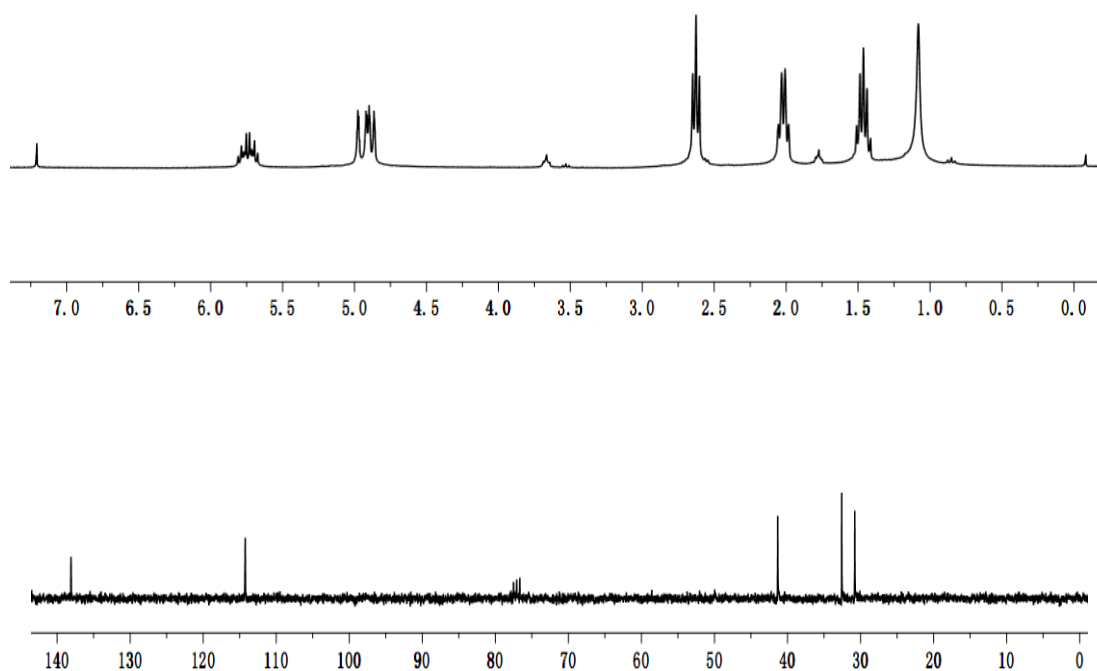

**Figure S5.**  $^1\text{H}$  and  $^{13}\text{C}$  NMR spectra of the substrate **S5** in  $\text{CDCl}_3$ .

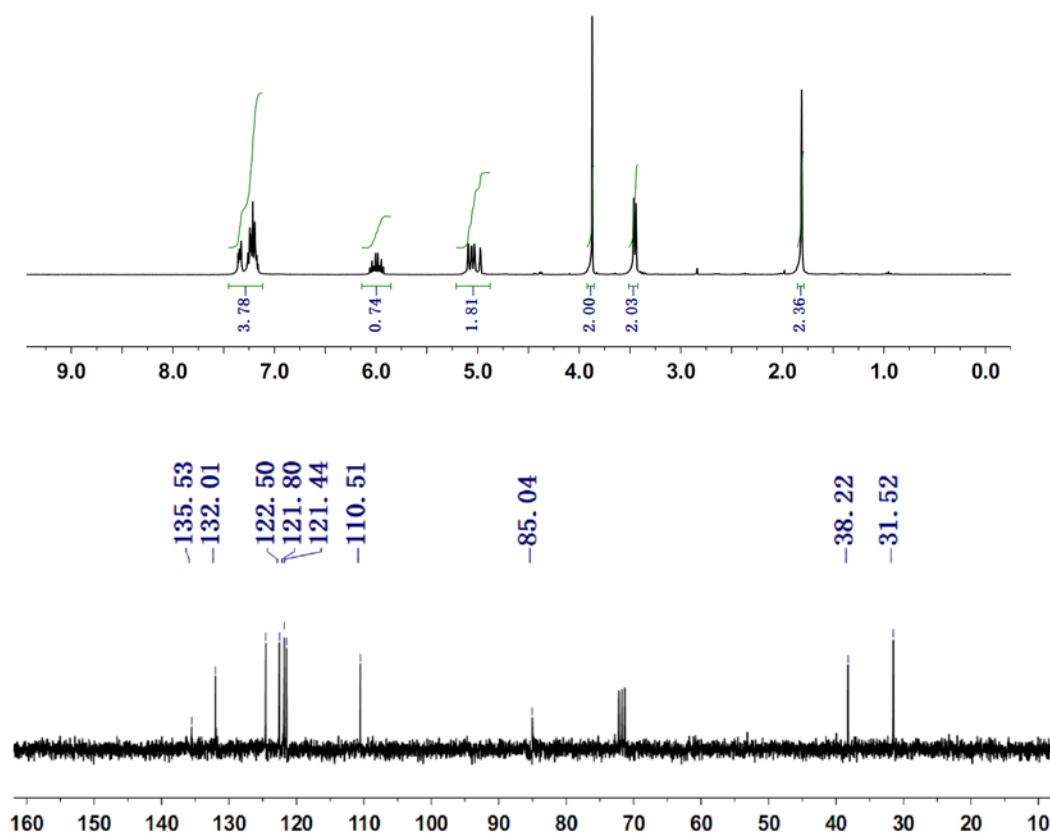

**Figure S6.**  $^1\text{H}$  and  $^{13}\text{C}$  NMR spectra of the substrate **S6** in  $\text{CDCl}_3$ .

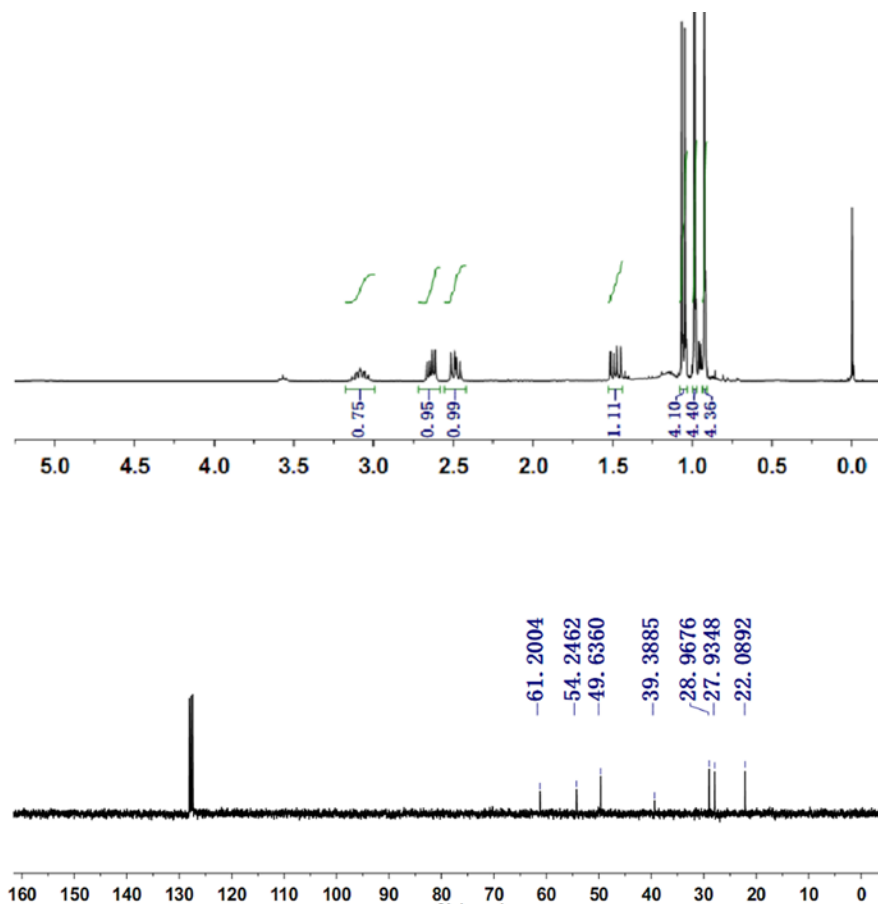

**Figure S7.** <sup>1</sup>H and <sup>13</sup>C NMR spectra of **P1** in C<sub>6</sub>D<sub>6</sub>.

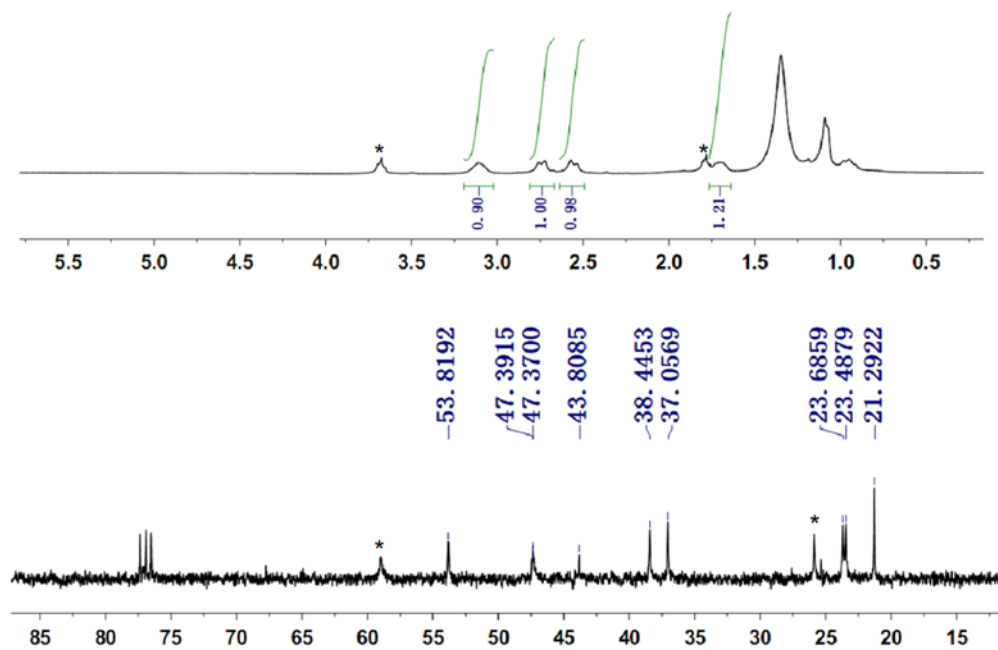

**Figure S8.** <sup>1</sup>H and <sup>13</sup>C NMR spectra of **P2** in CDCl<sub>3</sub>.

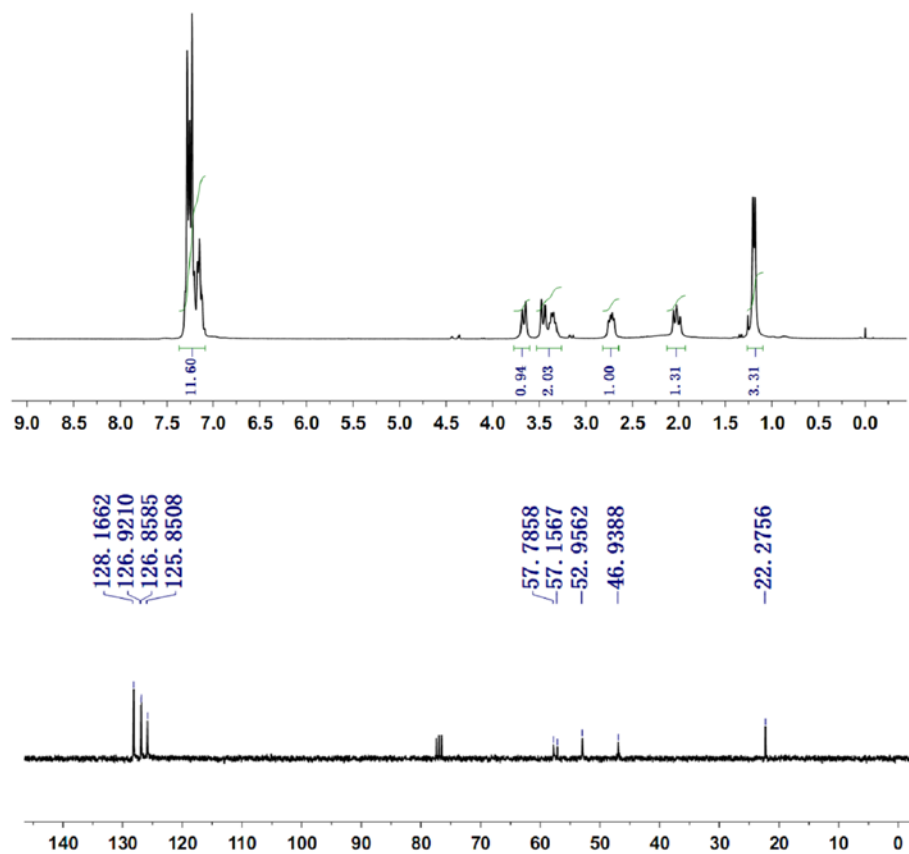

**Figure S9.** <sup>1</sup>H and <sup>13</sup>C NMR spectra of **P3** in CDCl<sub>3</sub>

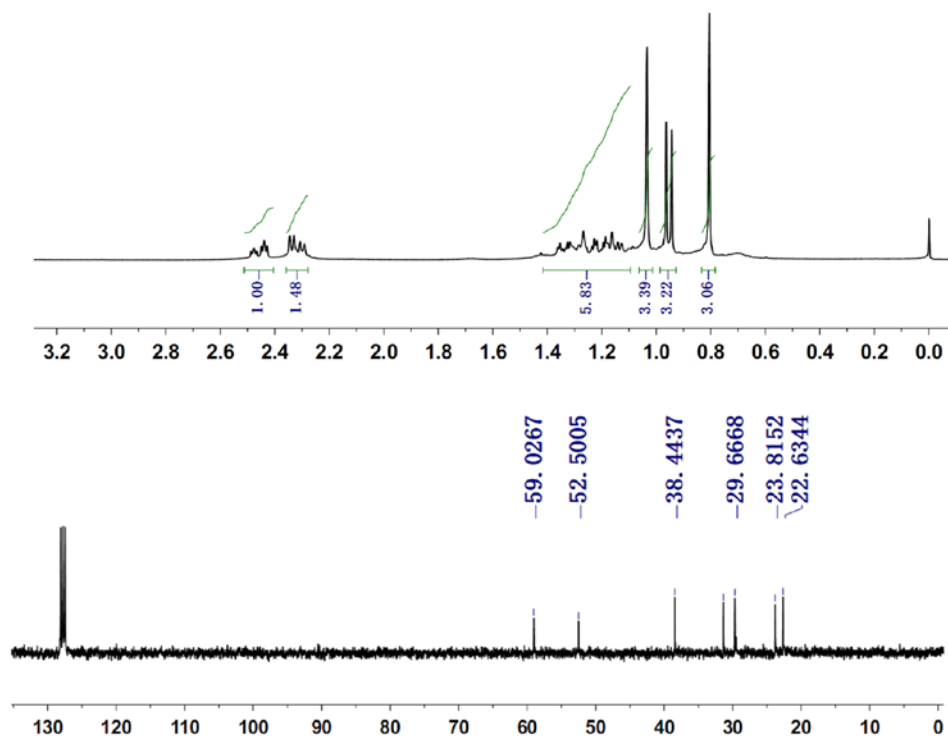

**Figure S10.** <sup>1</sup>H and <sup>13</sup>C NMR spectra of **P4** in C<sub>6</sub>D<sub>6</sub>.

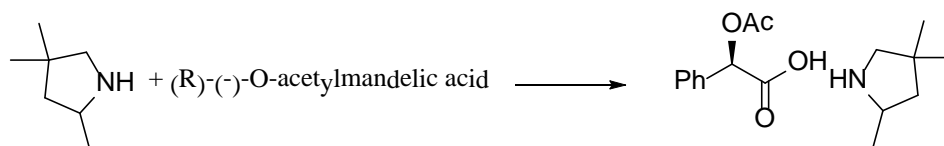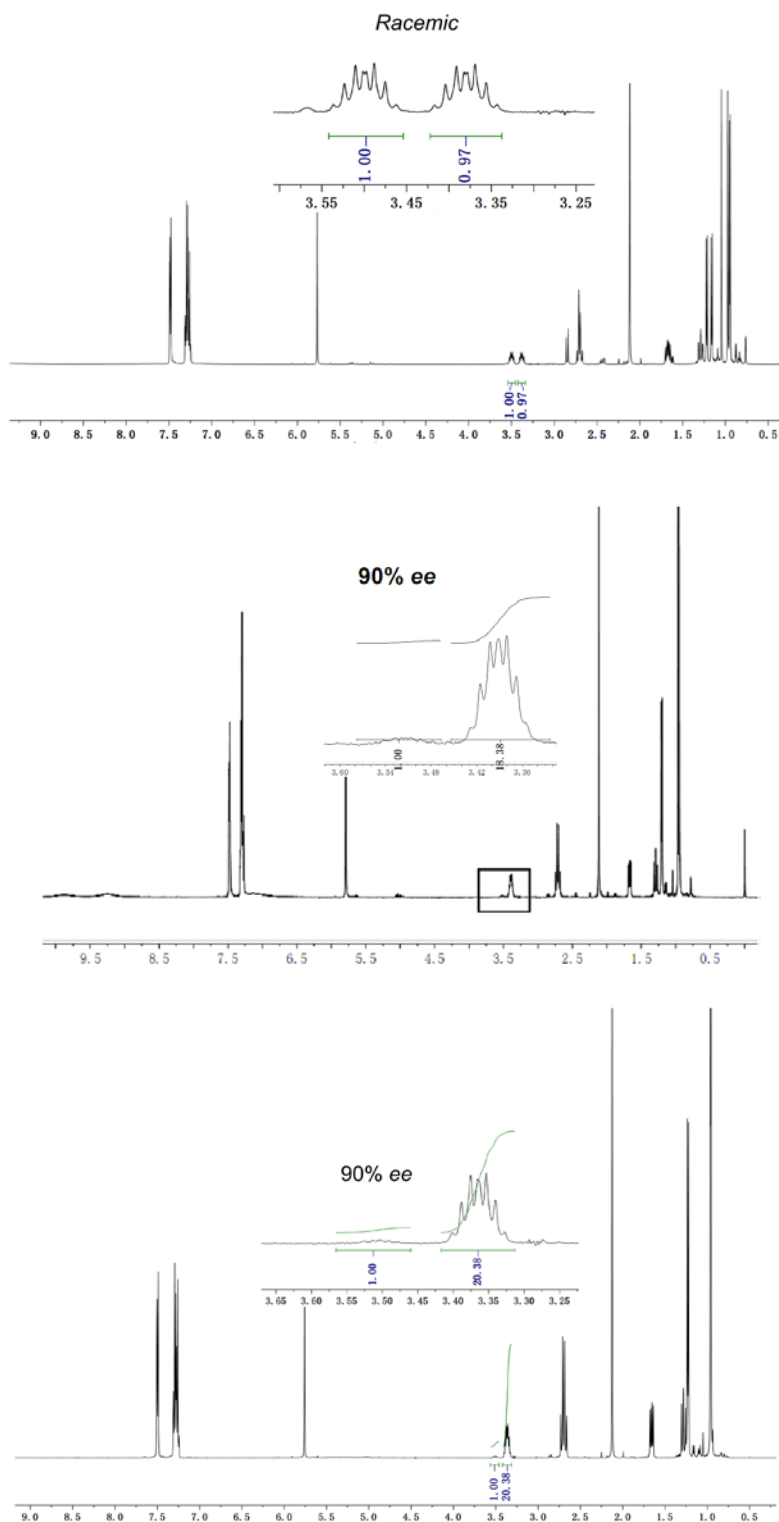

**Figure S11.**  $^1\text{H}$  NMR spectrum of the mixture of **P1** and (R)-(-)-O-acetylmandelic acid in  $\text{CDCl}_3$ .

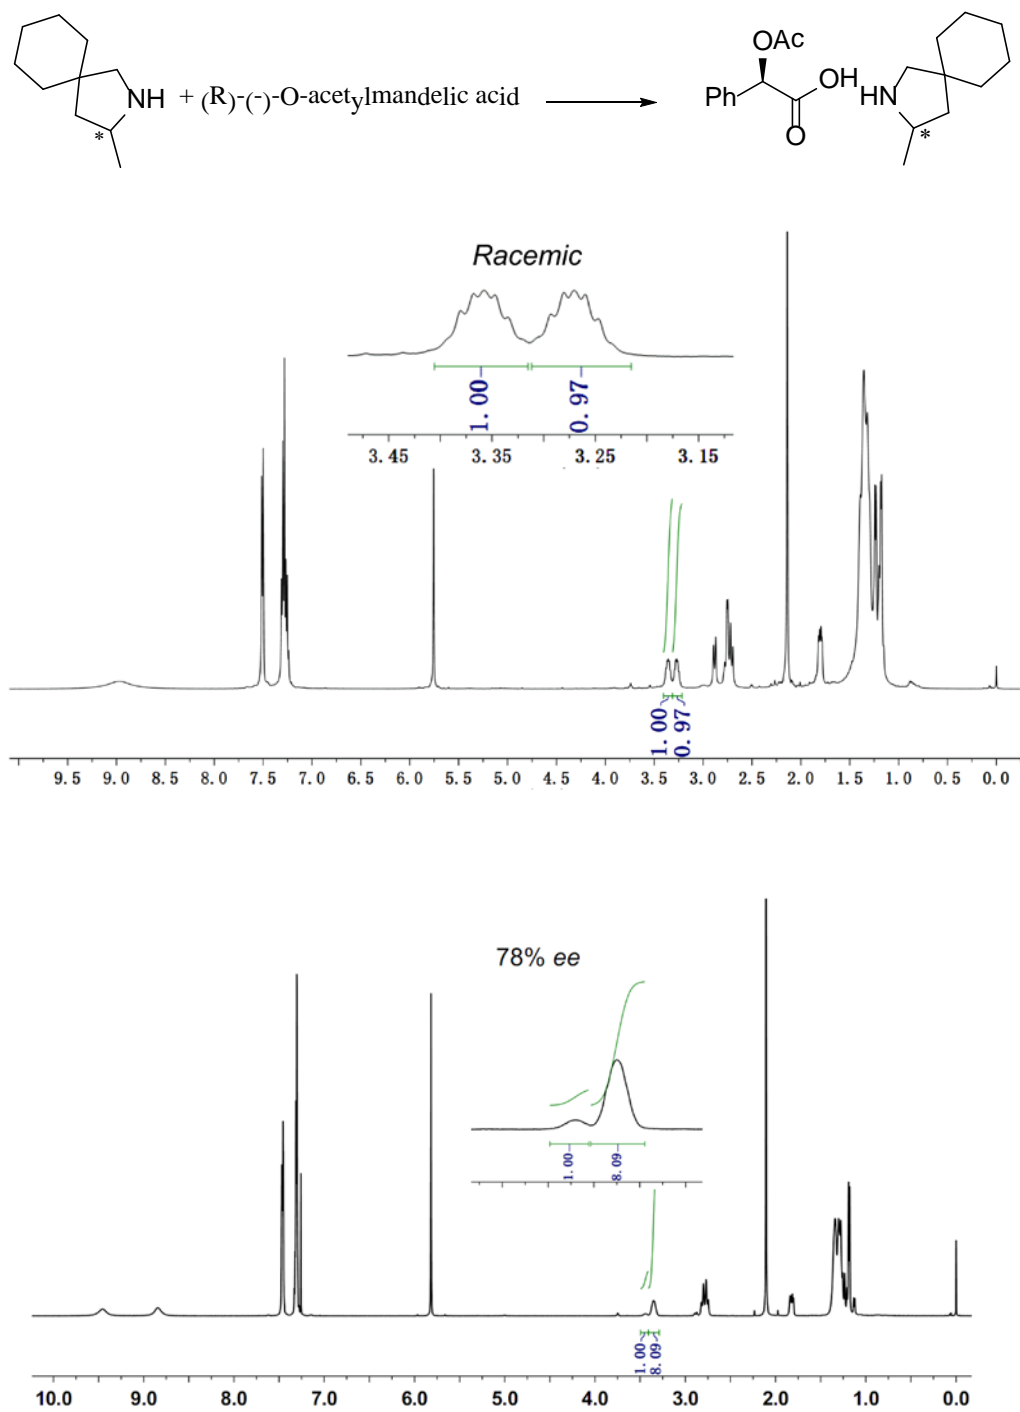

**Figure S12.**  $^1\text{H}$  NMR spectrum of the mixture of **P2** and (R)-(-)-O-acetylmandelic acid in  $\text{CDCl}_3$ .

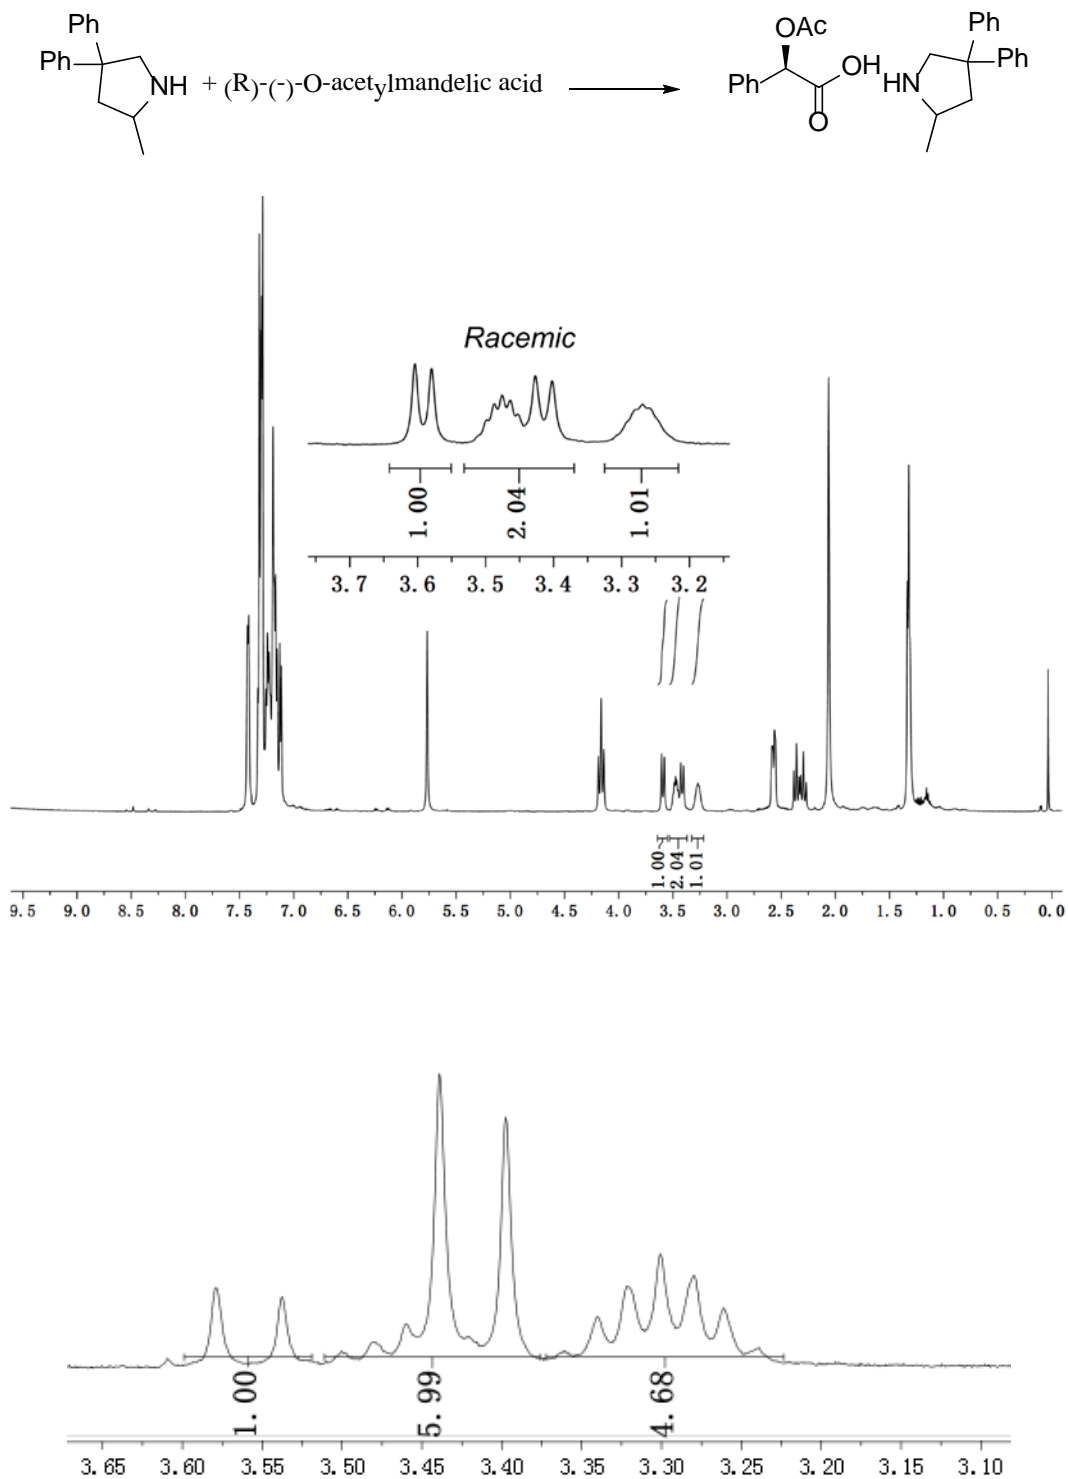

**Figure S13.**  $^1\text{H}$  NMR spectrum of the mixture of **P3** and (R)-(-)-O-acetylmandelic acid in  $\text{CDCl}_3$ .

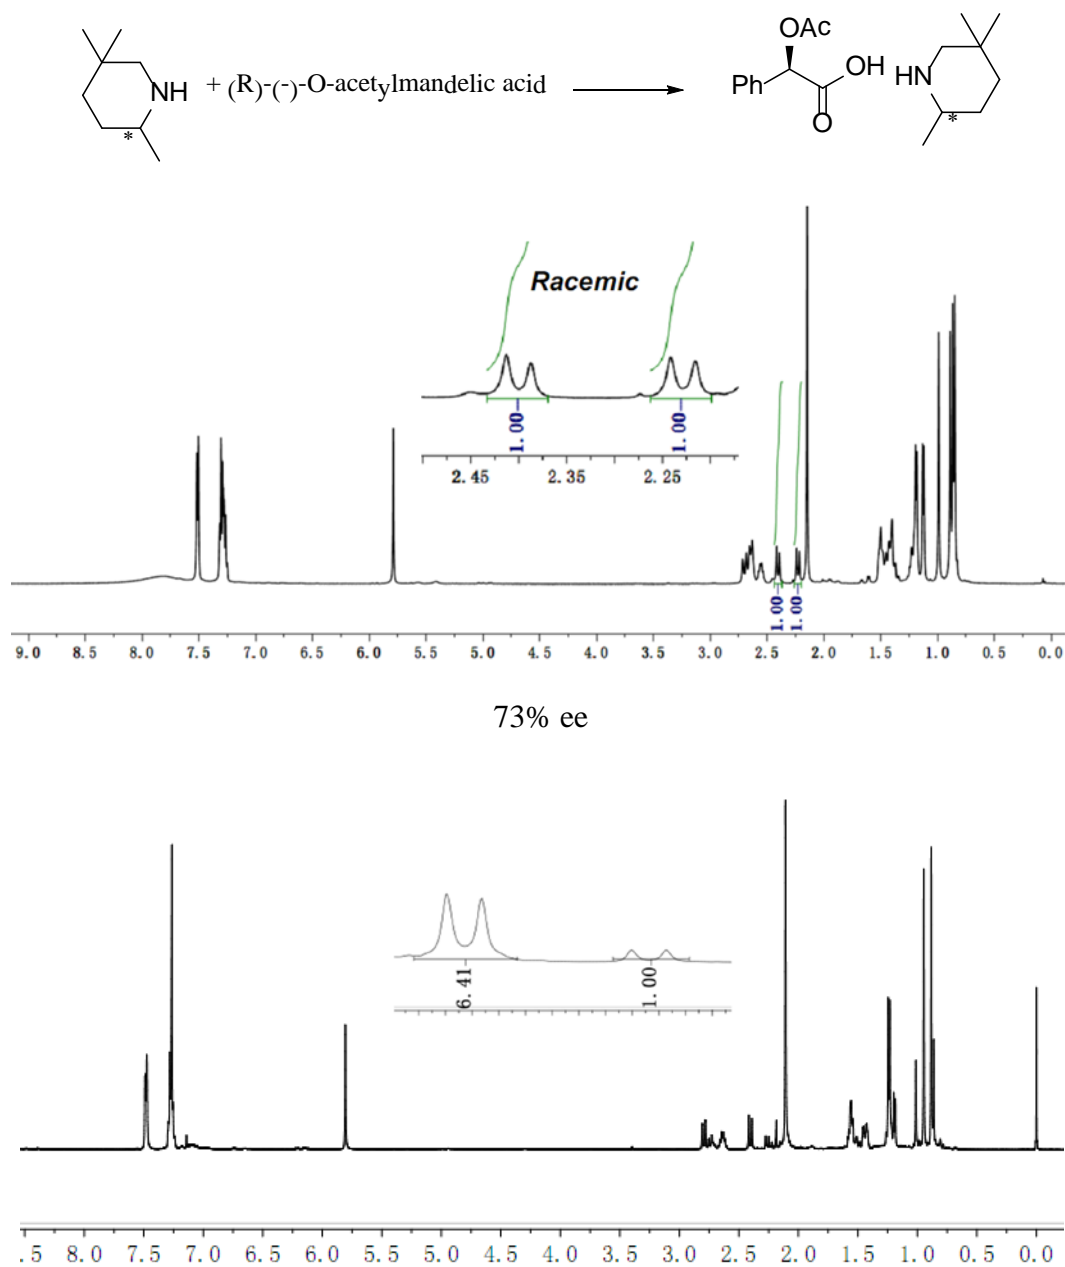

**Figure S14.** <sup>1</sup>H NMR spectrum of the mixture of **P4** and (R)-(-)-O-acetylmandelic acid in CDCl<sub>3</sub>.

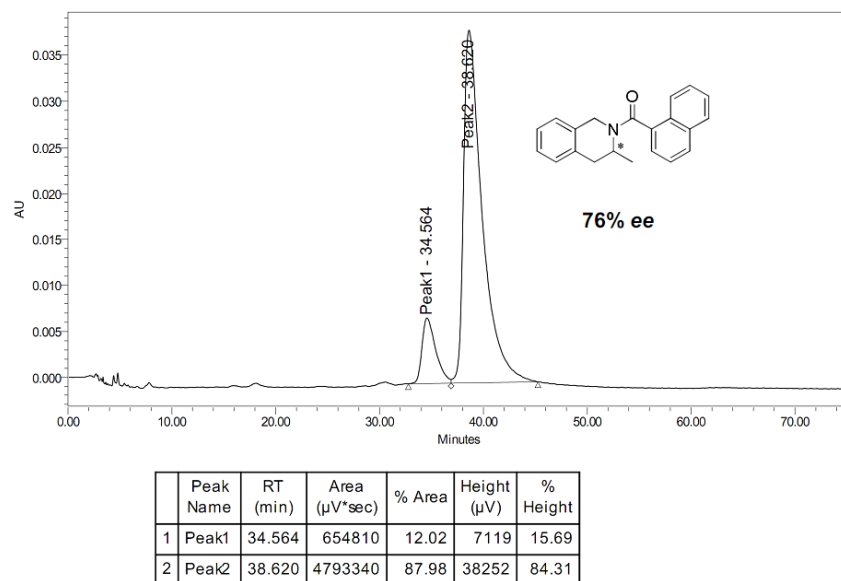

**Figure S15.** HPLC trace and integration data from the naphthoylamide of **P6**.

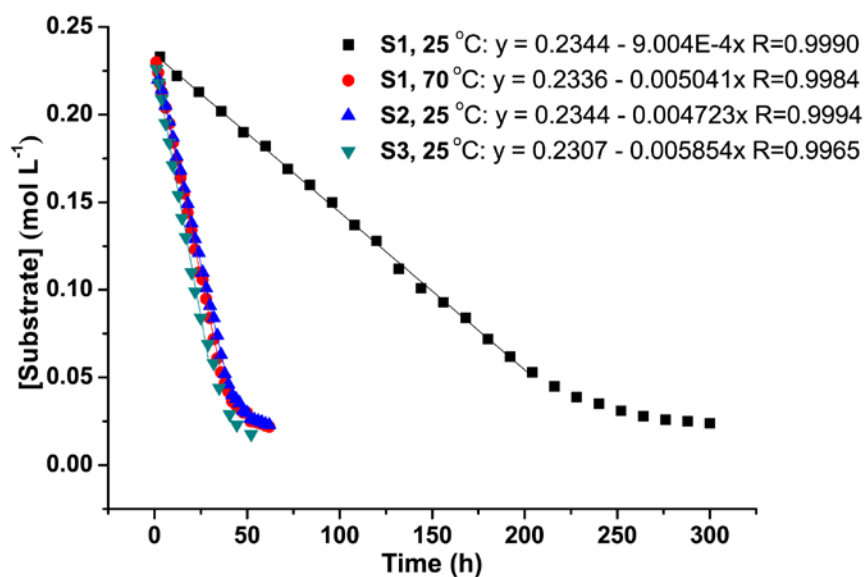

**Figure S16.** Time dependence of substrate concentration in the hydroamination/cyclization using complex  $1^n\text{BuLi}$ .

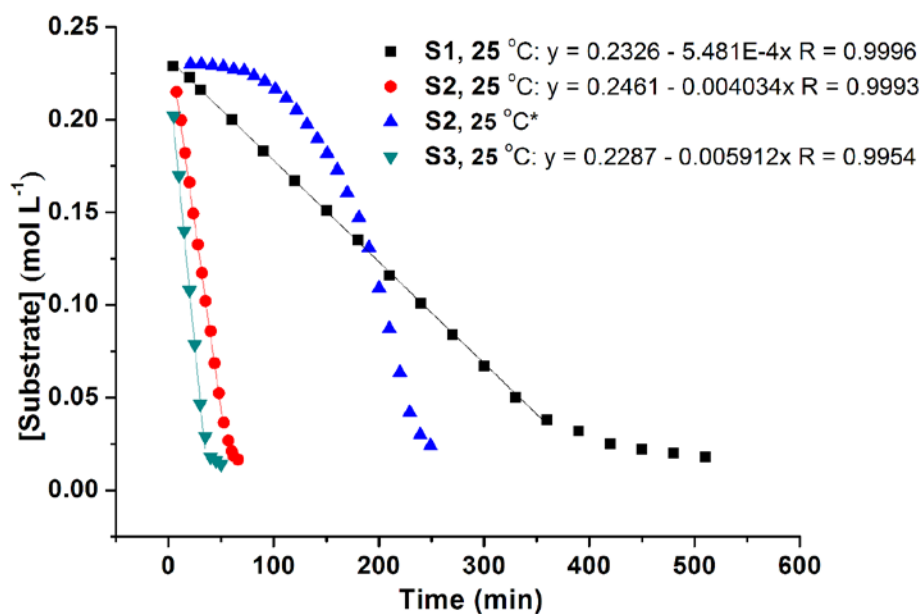

**Figure S17.** Time dependence of substrate concentration in the hydroamination/cyclization using complex  $2^n\text{BuLi}$ : \*The substrate S2 was mixed with butyllithium first, and the complex **2** later.

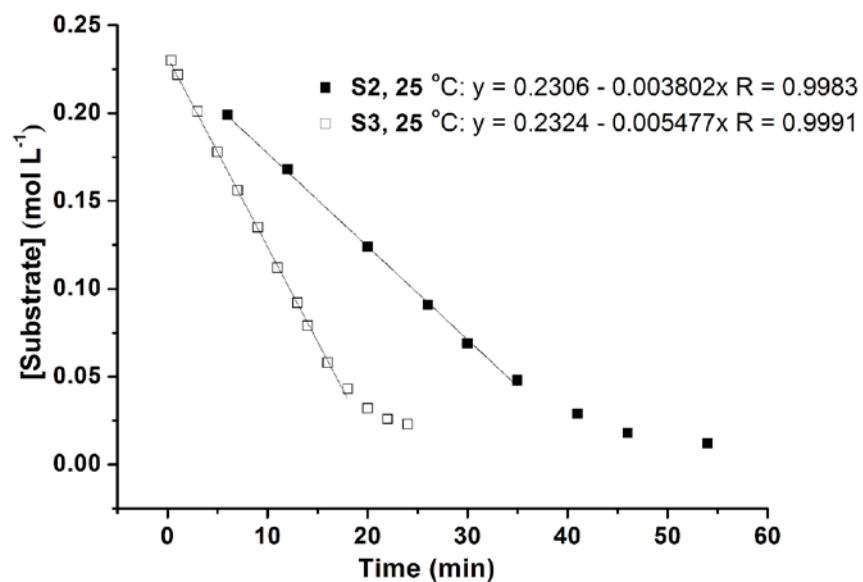

**Figure S18.** Time dependence of substrate concentration in the hydroamination/ cyclization using complex 3<sup>n</sup>BuLi.

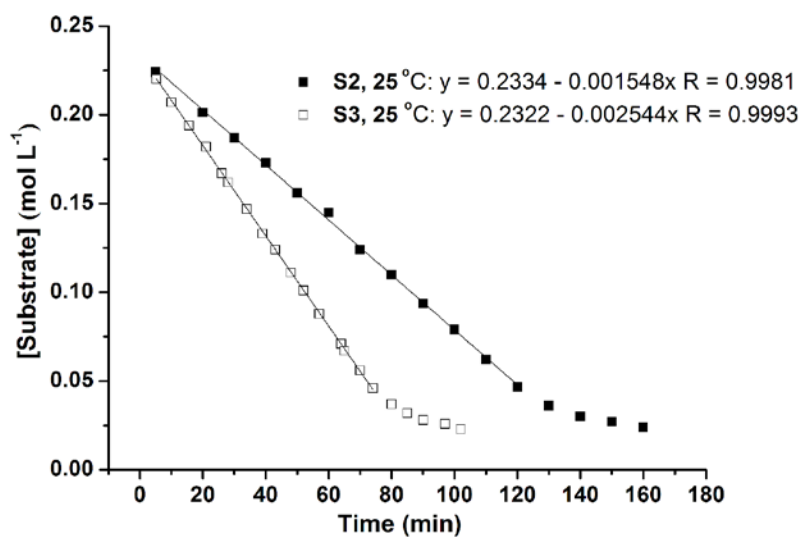

**Figure S19.** Time dependence of substrate concentration in the hydroamination/ cyclization using complex 4<sup>n</sup>BuLi.

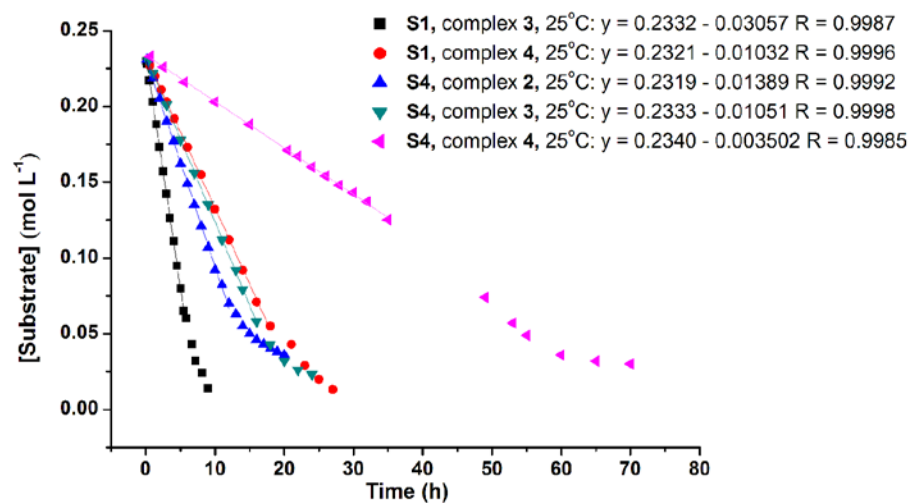

**Figure S20.** Time dependence of substrate concentration in the hydroamination/ cyclization.
